# Supplementary material
Source: MDPI journal article supplement (https://www.mdpi.com/2072-4292/15/1/79)
Supplement: s1 [file s1]

## SUPPLEMENTARY FILE

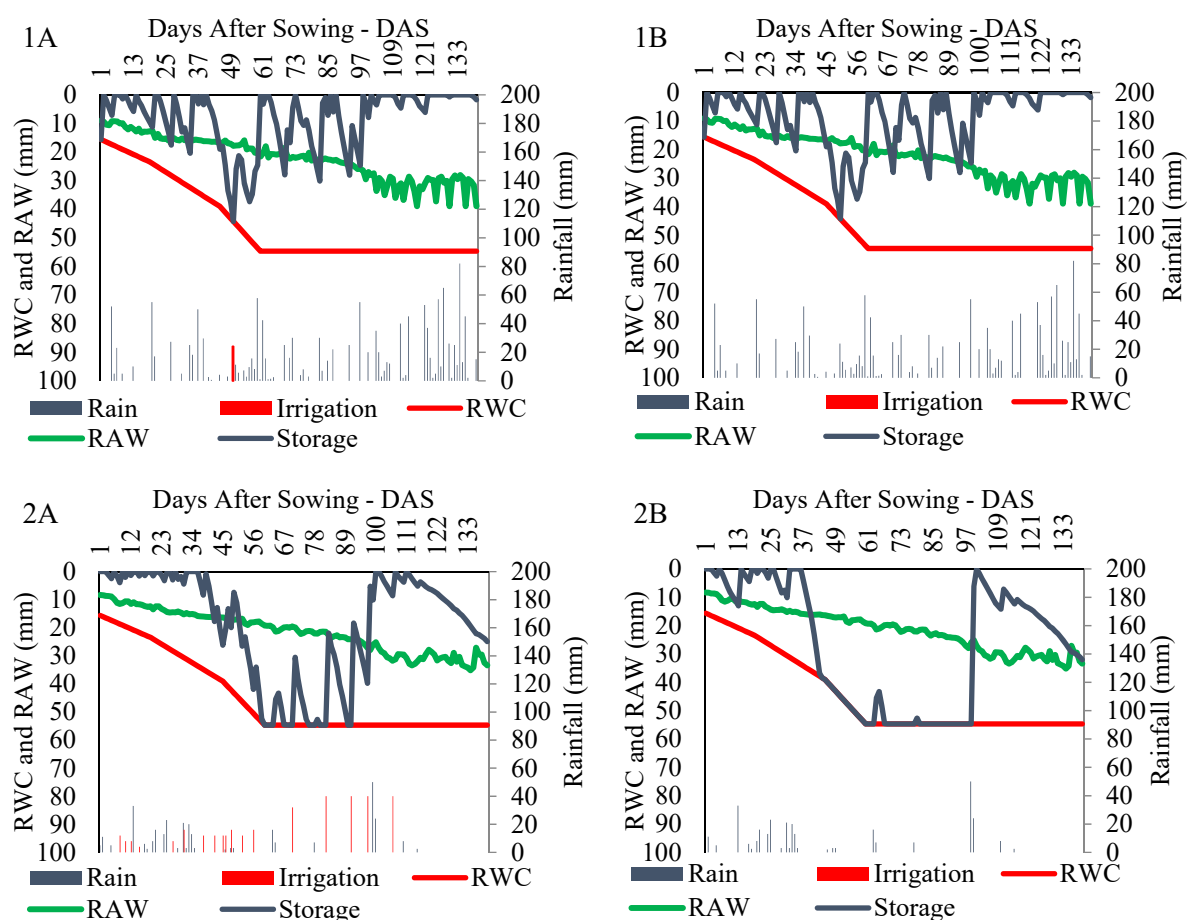

**Figure S1.** Water balance during the experiment periods (1<sup>st</sup> crop season and 2<sup>nd</sup> crop season), residual water content (RWD), readily available water (RAW) and water storage (Storage) for supplemented irrigation (1A and 2A) and rainfed condition (1B and 2B).
